1 Associations between sustainable development goals accelerators and  
2 well-being, by household heads' disability status among adolescents in  
3 Zambia – a cross-sectional study.

4

5 David Chipanta<sup>1 2 \*</sup>, Janne Estill<sup>1</sup>, Heidi Stöckl<sup>3</sup>, Lucas Hertzog<sup>4</sup>, Elona Toska<sup>4 5 6</sup>,  
6 Patrick Chanda<sup>7</sup>, Jason Mwanza<sup>7</sup>, Kelly Kaila<sup>8</sup>, Chisangu Matome<sup>9</sup>, Gelson  
7 Tembo<sup>9,10</sup>, Olivia Keiser<sup>1</sup>, Lucie Cluver<sup>11,12</sup>

8

9 <sup>1\*</sup>Institute of Global Health, University of Geneva, Geneva, Switzerland.

10 <sup>2</sup>Joint United Nations Programme on HIV/AIDS (UNAIDS)

11 <sup>3</sup>Institute for Medical Information Processing, Biometry, and Epidemiology

12 Medical Faculty, Ludwig Maximilians University München, Germany<sup>4</sup>Centre for  
13 Social Science Research, University of Cape Town, Cape Town, South Africa.

14 <sup>5</sup>Department of Social Policy and Intervention, University of Oxford, Oxford, UK.

15 <sup>6</sup>Department of Sociology, University of Cape Town, Cape Town, South Africa.

16 <sup>7</sup>Social Work and Sociology, University of Zambia, Lusaka, Zambia.

17 <sup>8</sup>Disability Inclusion Project Luapula, International Labour Organisation, Lusaka,  
18 Zambia.

19 <sup>9</sup>Palm Associates Limited, Lusaka, Zambia.

20 <sup>10</sup>Economics and Agricultural Sciences, University of Zambia, Lusaka, Zambia.

21 <sup>11</sup>Centre for Evidence-Based Intervention, Department of Social Policy and  
22 Intervention, University of Oxford, Oxford, UK

23 <sup>12</sup>Department of Psychiatry and Mental Health, University of Cape Town, Cape  
24 Town, South Africa

25

26 \*Corresponding author: Email: [chipanta@hotmail.com](mailto:chipanta@hotmail.com); [david.chipanta@etu.unige.ch](mailto:david.chipanta@etu.unige.ch)

27

28 E-mail addresses of authors:

29 JE: [janne.estill@unige.ch](mailto:janne.estill@unige.ch)

30 HS: [heidi.stoeckl@ibe.med.uni-muenchen.de](mailto:heidi.stoeckl@ibe.med.uni-muenchen.de)

31 LH: [lucas.hertzog@uct.ac.za](mailto:lucas.hertzog@uct.ac.za)

32 ET: [Elona.toska@uct.ac.za](mailto:Elona.toska@uct.ac.za)

33 PC: [patrick.chanda@unza.zm](mailto:patrick.chanda@unza.zm) ; [patrickchanda@ymail.com](mailto:patrickchanda@ymail.com)

34 JM: [jasonmwanza2@gmail.com](mailto:jasonmwanza2@gmail.com)

35 KK: [kaira@ilo.org](mailto:kaira@ilo.org)

36 CM: [chisangu@palmassociates.org](mailto:chisangu@palmassociates.org)

37 GT: [tembogel@gmail.com](mailto:tembogel@gmail.com)

38 OK: [Olivia.Keiser@unige.ch](mailto:Olivia.Keiser@unige.ch)

39 LC: [lucie.cluver@spi.ox.ac.uk](mailto:lucie.cluver@spi.ox.ac.uk)

40 **Associations between sustainable development goals accelerators**  
41 **and well-being, by household heads' disability status among**  
42 **adolescents in Zambia – a cross-sectional study.**

43 **Abstract**

44 **Objectives:**

45 We examined associations between accelerators (interventions impacting two or  
46 more SDG targets) and well-being indicators among adolescents in Zambia.

47 **Methods:**

48 We randomly sampled 1,800 households receiving social cash transfers (SCT) in  
49 four districts, surveyed adults 16 years and older. Using multivariable logistic  
50 regressions, stratified by household heads disability status, we examined  
51 associations between accelerators (SCT, life-long learning (LLL), mobile phone  
52 access (MPA)) and seven well-being indicators among adolescents 16 to 24 years  
53 old. We predicted adolescents' probabilities of reporting indicators using marginal  
54 effects models.

55 **Results:**

56 We included 1,725 adolescents, 881(51.1%) girls. MPA was associated with no  
57 poverty (adjusted Odds Ratio [aOR] 2.08,  $p < 0.001$ ), informal cash transfers (aOR  
58 1.82  $p = 0.004$ ), seeking mental support (aOR 1.61,  $p = 0.020$ ); SCT with no health  
59 access restrictions related to disability (aOR 2.56,  $p = 0.004$ ), lesser odds seeking  
60 mental support (aOR 0.53,  $p = 0.029$ ); LLL with informal cash transfers (aOR 3.49,  
61  $p < 0.001$ ), lower school enrolment (aOR 0.70,  $p = 0.004$ ). Adolescents living with  
62 disabled household heads reported worse poverty, good health, less suicidal  
63 ideation.

64 **Conclusions:**

65 Accelerators - SCT, LLL, MPA - were associated with well-being indicators.  
66 Adolescents living with disabled household heads benefited less.

67

68 **Relevance to SDGs:**

69 This paper shows that adopting accelerators can help achieve SDGs-aligned well-  
70 being indicators for adolescents living in poverty. However, accelerators may not  
71 offset disability-related inequalities. Adolescents living with disabled household  
72 heads may require more attention to achieve the SDGs.

73 **SDGs targets:**

74 1.2. no poverty; 1.3.1 social cash transfers, Informal cash transfers; 3. good Health;  
75 3.4. no suicidal ideation; 3.4. seeking mental support; 4.1. school enrolment; 10. no  
76 health access restrictions related to disability.

77

## 78 Introduction

79 Adolescents are a crucial population group to attain the Sustainable Development  
80 Goals (SDGs). Individuals aged 15 to 24 years comprise 15.5% (1.21 billion) of the  
81 global population, reaching 1.29 billion by 2030 [1]. Adolescence is a decisive period  
82 to intervene on multiple SDGs. The rapidly developing physical and mental growth,  
83 transition into adulthood taking place during adolescence have strong impact on  
84 health and well-being in adulthood [2,3]. In sub-Saharan Africa, where the growth of  
85 adolescents' population is fast, the potential to improve their well-being is more  
86 constrained [1]. The region's adolescents have high rates of mental health  
87 conditions, suicide, HIV, and other diseases [4]. A 10-year-old child is six times more  
88 likely to die by age 24 in sub-Saharan Africa than in North America or Europe.  
89 Globally, suicide is the second leading cause of death among adolescents aged 15 -  
90 25 years [4]. Suicidal ideation, defined as a preoccupation with thoughts of killing  
91 oneself, and planning of suicide among adolescents aged 13–17 years in low-  
92 income and middle-income countries were the highest in Africa [5]. Not being in  
93 employment, education, or training (NEET) also negatively impacts adolescents'  
94 well-being and successful transition into adulthood [6]. A quarter (25.9%) of  
95 adolescent girls and 15.8% of boys in sub-Saharan Africa were NEET in 2019 [7]. Of  
96 those employed, the majority (94.9 %) were in informal employment, living in  
97 extreme poverty, on less than US\$1.90 a day [7]. Mobile phone use which is among  
98 interventions that could improve adolescents' achievements of the SDGs is also  
99 limited in the region [8,9].

100 Urgent government coordinated actions are needed to accelerate the achievement of  
101 SDGs for the regions' adolescents, particularly in the context of the Coronavirus  
102 Disease 2019 (COVID-19) pandemic [10]. The United Nations Development  
103 Programme (UNDP) defines accelerators as interventions or circumstances that  
104 positively impacts two or more SDGs targets [11]. Studies on accelerators have  
105 shown multiple, large, and favourable changes in adolescents' mental health, the  
106 experience of transactional sex, violence, HIV prevention and treatment, and other  
107 SDG aligned outcomes from combining and re-arranging existing interventions. For  
108 example, social protection including cash transfers, education, safe schools, food  
109 security, parenting programmes, role of caregivers, and psychosocial support have  
110 been shown to be accelerators [12-14].

111 Disability is a serious threat to achieving the SDGs [15]. More than 1 billion people  
112 worldwide are estimated to be living with disabilities. The majority are left behind in  
113 several SDGs [15,16]. On the other hand, cash transfer programmes, in general not  
114 only include people with disabilities [15], but also often pair the programmes with  
115 training (life-long learning) to emphasize or explain programme objectives. The  
116 programmes also deliver cash and other services via mobile phones to individuals  
117 and households [17]. Social cash transfers (SCT), life-long learning (LLL) and mobile  
118 phone access (MPA) could potentially be accelerators and support adolescents in  
119 households headed by persons with disabilities. We, therefore, aimed to test whether  
120 SCT, LLL and MPA fulfil the definition of accelerator in this study, and how they  
121 interact with the household heads' disability status in improving the SDGs aligned  
122 well-being indicators for adolescents.

123 **Methods:**

124 ***Data sources and sample***

125 We used the baseline data collected in August to September 2019 for the evaluation  
126 of the United Nations Partnership on the Rights of People with Disabilities  
127 (UNPRPD) project in Luapula province [18]. The UNPRPD started in January 2019  
128 in two Luapula province districts in Zambia and will end in December 2021. It aims to  
129 increase HIV and sexual and reproductive health services among girls and women  
130 with disabilities receiving SCT in two districts. We also collected data from two  
131 districts in the same province not covered by the UNPRPD, but receiving SCT, to  
132 provide comparators in the evaluation.

133 Households are eligible to receive the SCT if government authorities identify them as  
134 extremely poor through measures of standards of living and satisfying one or more of  
135 the following criteria: women-headed; headed by a person aged 65 years or older,  
136 have a member with a disability; have adult members who are unable to work or  
137 support themselves economically and host orphans and vulnerable children, i.e., any  
138 child below 18 years who may be living with HIV, has lost one or both parents to HIV,  
139 or from any cause, or lives in a community affected by HIV [19]. Eligible households  
140 received ZMK90 (USD12) per month, and ZMK180 (USD24) if they included a  
141 person with a disability. The payments were disbursed every two months through a  
142 local pay point manager, the post office, or the recipients' bank account [19].

143 ***Sample size calculation***

144 We calculated a minimum sample size of 1,800 households, from 90 community  
145 welfare action committees (CWACs) which are political units, and 20 households per  
146 CWAC. Our sample size calculation assumed a statistical significance ( $\alpha$ ) of 0.05,  
147 power of 80% and Intra-class Correlation Coefficients (ICCs) ( $\rho$ ) of 0.01 to 0.08 and  
148 intervention effect ( $\delta$ ) of at least 0.20 on HIV prevention services including condom  
149 use [20]. We sampled respondents in two stages. In stage one, we sampled CWACs  
150 using proportional probability sampling without replacement so CWACs with more  
151 households and typically with more services would be more likely to be selected. In  
152 stage two, from each CWAC, we sampled 25 households, instead of 20, to allow for  
153 non-response.

154 ***Procedures***

155 Trained fieldworkers first obtained and recorded consent from every respondent  
156 aged 16 years or older on the electronic tablets (thumbprints for oral, and signatures  
157 for written consents). They then administered a questionnaire in the area's local  
158 language on the electronic tablets installed with Open Data Kit software to the  
159 household head and all household members aged 16 years or older who consented.  
160 The survey contains questions on socio-demographic characteristics, self-rated  
161 poverty, health and well-being, mental health, school enrolment, disability status,  
162 proximity to health facilities, health access restrictions related to disabilities, health  
163 services, receipt of SCT offered by the government, non-governmental organizations  
164 and individuals, training, and MPA. We derived the questions from piloted and  
165 validated tools, including the UNICEF Innocenti tools and Demographic and Health

166 Survey. We translated the questions from English into the local language. We trained  
167 the fieldworkers using role plays to ensure understanding and standardized  
168 administration of the questionnaire. We stored and electronically transferred the data  
169 to a secure server. We analyzed responses only from respondents aged 16 to 24  
170 years.

171 The study protocol was reviewed by the University of Zambia Humanities and Social  
172 Sciences Research Ethics Committee (IRB Approval No. 2019-April-001) and the  
173 ethics committee in the Canton of Geneva (no 2019-00500).

#### 174 ***Measures and variables:***

175 We identified and three potential accelerators: 1) SCT, 2) LLL, and 3) MPA, and  
176 seven SDGs aligned indicator target outcomes in the data based on our review of  
177 the literature. We defined the accelerators as follows: SCT provided by the  
178 government with the question: “During the past 12 months, has the respondent or  
179 any household member received money or goods, including food, clothing, livestock,  
180 or medicines from any of the following government programmes, social cash  
181 transfers and other government transfers?” (Other government transfers combined  
182 respondents or their household’s receipt of school uniforms, scholarships, food  
183 security pack, school feeding, and farm input subsidy), coded no, yes; LLL,  
184 combined participation in government offered training on HIV, disability, gender-  
185 based violence, human rights, sexual and reproductive rights, job skills, social  
186 protection and economic empowerment derived from the question: “During the past  
187 12 months, have you or any of the household members received any training  
188 provided by the government on general health, food and nutrition, sexual and  
189 reproductive rights, HIV, human rights, and gender-based violence, social protection,  
190 job skills, and economic empowerment?” coded yes if the participant responded to  
191 have participated in any of the training, otherwise no; MPA with the question “What  
192 phone number is used at this house?” (Response options were no phone, phone  
193 number)” coded no for no phone, yes for phone number.

194  
195 We defined the SDG aligned indicator outcomes as follows: No poverty with the  
196 question: “Do you consider your household to be nonpoor, moderately poor, or very  
197 poor?” coded very poor, moderately poor; Informal cash transfers with the  
198 question: “During the past 12 months, has the respondent or any household  
199 members received money or goods, including food, clothing, livestock, or medicines  
200 from individuals who are not part of the family or non-governmental organizations?”  
201 coded no, yes; Good health with the question: “Have you been sick or injured in the  
202 last two weeks?” coded physically sick, not sick; No suicidal ideation with the  
203 question: “Did you have thoughts of hurting or killing yourself? coded *yes, no*;  
204 Seeking mental support with the question “What health facility or other institutions or  
205 persons did you see for any of the identified mental health issues?” coded no did not  
206 see; yes saw. Seeking mental support proxied having mental health problems and  
207 seeking help to resolve them. School enrolment combined the responses from the  
208 question: “Are you currently attending school? (Check relevant choice) nursery/pre-  
209 school, other grades full-time, other grades part-time, community school, full-time,  
210 correspondence, adult literacy class, tertiary school” coded no, yes. The proportion  
211 of adolescents currently in school versus those not in school for 20 to 24-year-olds,  
212 coded no, yes; No health access restrictions related to a disability with the

213 question: “Are you limited in accessing health services because of your  
214 impairment?” coded limited, not limited.  
215

216 We controlled for age (16 to 19, 20 to 24 years), biological sex (male, female),  
217 disability status (not disabled, disabled), proximity to health facility (<7 or ≥ 7  
218 kilometres), and district (Kawambwa, Nchelenge, Mansa, and Samfya). We  
219 assessed household heads’ disability with questions from the Washington Group  
220 Short Questions (WGSQ) on disabilities. The WGSQ asks respondents if they have  
221 difficulties with seeing, hearing, walking, cognition, self-care, or communicating. For  
222 each disability type, the answer options are “no”, “yes – a little”, “yes – a lot”, “cannot  
223 at all.” We defined a respondent as disabled in the disability type they answered:  
224 “yes – a lot” or “cannot at all” and grouped the disability variables into a composite  
225 variable reflecting if the respondent had any of the six types of disability [21].

## 226 **Analysis**

227 We conducted analyses in three steps. First, we explored the socio-demographic  
228 characteristics, hypothesized accelerators and SDGs aligned outcomes by  
229 household head's disability status. Second, we tested for associations between each  
230 SDG-aligned outcome and hypothesized accelerators simultaneously using the  
231 Fishers exact test and reported crude proportions, 95% confidence intervals (CI) and  
232 p-values. We adjusted for covariates in multivariable logistic regressions and  
233 corrected for multiple hypothesis testing using the Benjamin, Yekutieli, Krieger (BYK)  
234 False Discovery Rate Sharpened Qs [22]. We interpreted the FDR adjusted p-value  
235 as a p-value of 0.05, resulting in 5% of significant tests being false positives. FDR  
236 adjusted p-values result in fewer false positives than non-FDR adjusted p-values.  
237 Third, we predicted adolescents' probabilities of experiencing each outcome from no  
238 accelerators to cumulative accelerators combinations by household heads' disability  
239 status using marginal effects models with the Stata margins command keep other  
240 covariates at their mean values. We reported the changes in probabilities for each  
241 indicator.

242 As a sensitivity analysis, we calculated adjusted probabilities of experiencing each  
243 outcome from multiple-outcome probit models that correlated the error terms of three  
244 potential accelerators in each model, using the mvprobit command in Stata 14.1 set  
245 at 50 random draws. Each regression regressed one of the seven SDG aligned  
246 outcomes for adolescents on the three accelerators controlling for sociodemographic  
247 factors. We clustered analyses at the CWAC level and used Stata version 14.1 for  
248 analysis.

## 249 **Results:**

250 The sample comprised 1,725 adolescents from 1,545 households in 90 CWACs.  
251 Overall, 881 (51.1%) were girls and 844 (48.9%) boys. The median age in years was  
252 19 (interquartile range 17 to 21). Eight per cent (145) of the adolescents lived with  
253 household heads with disabilities. Half (75, 51.7%) of household heads with  
254 disabilities reported at least “a lot” of difficulties in remembering, 43 (29.6%) in  
255 seeing and 14 (9.6%) in self-care. Many socio-demographic characteristics and SDG

256 aligned targets indicators differed significantly between adolescents living with  
257 household heads with and without disability; the three hypothesized accelerators did  
258 not differ.

259

260 [Insert Table 1 here]

261

262 The three hypothesized accelerators - SCT, LLL and MPA – were significantly  
263 associated with no poverty, informal cash transfers, good health, no suicidal ideation,  
264 school enrolment and no health access restrictions related to disabilities when we  
265 did not control for socio-demographic covariates. However, SCT was associated with  
266 lower levels of seeking mental support among adolescents (Table 2A). Adolescents  
267 with MPA, reported higher levels of no poverty (39% versus 23.9%,  $p < 0.001$ ),  
268 accessing informal cash transfers (26.6% versus 16%,  $p < 0.001$ ), good health (34.5%  
269 versus 30.2%,  $p = 0.042$ ), seeking mental support (38.4% versus 26.9%;  $p < 0.000$ )  
270 and school enrolment (48.8% versus 39.7%,  $p < 0.001$ ) than those without MPA.

271 After adjusting for age, gender, household heads' disability status, distance from the  
272 nearest health facility and district, all hypothesized accelerators remained associated  
273 with two or more SDG-aligned outcomes (Table 2B). Good health and no suicidal  
274 ideation were no longer associated with any hypothesized accelerator. Having  
275 access to a mobile phone was associated with higher odds of no poverty, accessing  
276 informal cash transfers, seeking mental support and school enrolment. SCT were  
277 associated with higher odds of informal cash transfers, no health access restrictions  
278 related to disability but lower odds of seeking mental support. LLL was associated  
279 with increased odds of accessing informal cash transfers but lower odds of school  
280 enrolment.

281 [Insert Tables 2A and 2B here]

282

283 Figure 1 shows the changes in probabilities of experiencing each of the seven SDG-  
284 aligned outcomes from potential accelerators compared to no accelerators: 1) SCT  
285 alone, 2) SCT plus LLL, 3) SCT plus MPA, 4) SCT, plus LLL and MPA. Results are  
286 stratified by disability status of the household head. Potential accelerators were  
287 associated with an absolute increase of at least 0.02 in the probability of SDG  
288 aligned targets indicators. However, the probability of seeking mental support was  
289 decreased by SCT alone, SCT plus LLL, and SCT plus MPA. The probability of  
290 school enrolment was also decreased by SCT plus LLL.

291 Adolescents with household heads with disabilities had lower probabilities of  
292 reporting no poverty, accessing informal cash transfers, good health and no suicidal  
293 ideation from no potential accelerators than their counterparts without household  
294 heads with disabilities. They further reported lower probability changes from potential  
295 accelerators in no poverty, accessing informal cash transfers, good health, and no  
296 health access restrictions related to disability. The probability increase in no suicidal  
297 ideation from potential accelerators was higher among adolescents living with

298 household heads with disabilities. Changes in seeking mental support and school  
299 enrolment did not differ by the disability status of the household head. The greatest  
300 probability changes from receiving no potential accelerators to receiving potential  
301 accelerators were in accessing informal cash transfers (Figure 1).

302

303 [Insert Figure 1 here]

304

305 Synergies – combinations – of potential accelerators were associated with changes  
306 in the probabilities of experiencing levels of SDG-aligned targets indicators outcomes  
307 for adolescents living with household heads with and without disabilities. A  
308 combination of all potential accelerators - SCT, LLL and MPA – was associated with  
309 a 0.15 and 0.11 probability increase in levels of no poverty for adolescents living with  
310 household heads without and with disabilities; 0.37 and 0.30 probability increase in  
311 levels of accessing informal cash transfers and 0.14 and 0.13 of experiencing no  
312 health access restrictions related to a disability, respectively (Figure 2).

313

314 [Insert Figure 2 here]

315

316 The sensitivity analysis results between the models we used and the models that  
317 account for correlations between the error terms of the potential accelerators were  
318 equivalent. However, the p-values were lower in the outcome models accounting for  
319 the correlation between potential accelerators (Supplementary Table 1).

## 320 **Discussion**

321 This study examined associations between potential accelerators - SCT, LLL, and  
322 MPA - and SDG aligned well-being indicator targets - 1.2 no poverty; 1.3.1 SCT,  
323 Informal cash transfers; 3.0 good Health; 3.4 no suicidal ideation, seeking mental  
324 support; 4.1 school enrolment; and 10.0 no health access restrictions related to  
325 disability - among adolescents. We found high potential for improving vulnerable  
326 adolescents' SDG-aligned well-being by combining SCT, LLL and MPA  
327 interventions. Our findings fit within an emerging body of evidence confirming that  
328 SCT, LLL and MPA are accelerators for adolescents [8,10,13]. It further found that  
329 adolescents benefited unequally depending on their household heads' disability  
330 status and that combining existing interventions may not overcome inequalities  
331 arising out of the disability of the household head.

332 Several studies conducted in Zambia and elsewhere confirm our results that SCT  
333 were associated with multiple SDG aligned target outcomes such as higher levels of  
334 informal cash transfers, no health access restrictions related to disability, and lower  
335 levels of seeking mental support. Studies conducted in Zambia show that SCT  
336 reduced relative poverty, increased women's satisfaction regarding their children's  
337 well-being, and schooling among school-going adolescents [23,24]. SCT also  
338 increased material well-being (children's material needs met), food insecurity, and



339 asset ownership [25]. In sub-Saharan Africa and elsewhere, SCT have been shown to  
340 increase psychological well-being, and decrease relative and absolute poverty  
341 [26,27]. In our study, receiving SCT alone was associated with a substantial  
342 decrease in seeking mental support. Combining SCT with LLL or MPA was  
343 associated with more reductions in seeking mental support. This result suggests that  
344 households' lack of money, LLL opportunities, and MPA may have necessitated  
345 respondents to seek mental support. Providing SCT, LLL and MPA interventions  
346 may be vital for addressing the mental support needs of adolescents living in  
347 poverty.

348 However, in our study SCT were not associated with good health; neither were MPA  
349 and LLL. This result fits within a body of evidence showing that cash transfers have  
350 positive, complex, and mixed effects on health. A review of 56 studies from low and  
351 middle-income countries found that cash transfers increased dietary diversity,  
352 access and utilization of health services but had little impact on children's  
353 anthropometric measures [26]. In high-income countries, self-rated health, chronic  
354 health conditions, and mortality for cash transfer recipients were worse than among  
355 non-recipients. On the contrary, in the United States, cash transfers were associated  
356 with improved self-rated health [28]. One reason why SCT, MPA, and LLL in our  
357 study were not associated with good health could be that physical illnesses among  
358 our sample was widespread. Two-thirds (67.8%, n=1169) of adolescents reported  
359 physical illnesses. Another is that malaria is endemic in the study area [29]. SCT,  
360 MPA and LLL alone might have been insufficient to resolve these illnesses.  
361 Innovative prevention and treatment of malaria, and other illnesses, combined with  
362 SCT, MPA, and LLL, should be implemented.

363 Contrary to views that cash transfers and other public transfers reduce informal  
364 transfers [30], our study found the opposite result; SCT were associated with  
365 increased receipt of informal cash transfers. This result is supported by evidence  
366 [31,32]. One explanation for our study's finding is that the process of receiving SCT  
367 may have identified households who were in need of financial and material support,  
368 linked them to support, strengthened trust of each other, increased social inclusion  
369 and solidarity [31-33]. Another explanation is that our study did not include pensions  
370 and social security transfers analyzed in the study that found contradictory findings  
371 to our study results [30]. Pensions and social security transfers, derived from  
372 mandatory savings employees make during employment, tend to be larger than  
373 SCT. In addition, pensions and social security transfers recipients may be wealthier,  
374 making them less likely to be perceived as in need of informal cash transfers [31].

375 The positive associations found in our study between MPA and no poverty, informal  
376 cash transfers, and school enrolment are also supported by evidence [8,34]. Access  
377 to mobile phones can promote adolescents' wellbeing, expand their social networks  
378 and personal growth opportunities [8]. Social protection and cash transfers are being  
379 delivered via mobile phones, alongside electronic vouchers, bank accounts and  
380 other payment systems to adults in households [35]. Mobile phones use also  
381 enables access to vital services [8,34]. Informal financial transfers make the bulk of  
382 financial transactions transferred via mobile phones in sub-Saharan Africa [36]. The  
383 negative association found in our study between MPA and seeking mental support

384 suggests that lack of mobile phone access may be mentally distressing for  
385 adolescents. One main reason is that they may miss out on informal cash transfers  
386 and other services to improve their well-being [8,34,36]. Providing mobile phones to  
387 households who do not have them, is being done and can help improve adolescents  
388 access to social protection, cash transfers and mental support [35].

389 In our study, LLL's associations - increase in informal cash transfers, and reductions  
390 in odds of seeking mental support and school enrollment – are limited than those of  
391 SCT and MPA, but no less critical. LLL re-enforces and complements the objectives  
392 of social protection and cash transfer programmes. LLL may bring participants  
393 together, potentially increasing their social networks - addressing the needs to seek  
394 mental support - and informal cash transfers. LLL is unlikely to have pulled  
395 adolescents out of school. Two-thirds of adolescents were already not attending  
396 school. LLL and the skills it provides can be beneficial to these adolescents [37].

397 Adolescents did not evenly benefit from SCT alone, with LLL, MPA or LLL and MPA,  
398 although they benefited from these accelerators. Adolescents living with household  
399 heads with disabilities reported lower benefits from these accelerators in no poverty,  
400 informal cash transfers, good health, and no disability health access restrictions than  
401 those living with household heads without disabilities. Previous studies, including a  
402 systematic review, support this finding showing that living with a household member  
403 with a disability had high cost and poverty implications for the household [38,39].  
404 These studies concluded that households must spend as much as 26% more  
405 resources to obtain an equivalent standard of living compared to those without  
406 disabilities [38,39]. Adolescents in our sample living with household heads with  
407 disabilities reported themselves poorer, may have had much more diminished  
408 resources and saddled with caregiving responsibilities adversely affecting their well-  
409 being than their peers living with household heads without disabilities. However,  
410 adolescents living with household heads with disabilities reported greater benefits  
411 from accelerators in no suicidal ideation. Their probabilities of reporting no suicidal  
412 ideation from no accelerators were lower compared to their peers without household  
413 heads with disabilities. This result suggests that household heads' disability status  
414 may have mitigated suicidal ideation among adolescents. Such adolescents might  
415 have benefited from parental supervision during caregiving which is known to be  
416 protective against suicidal behaviour [40]. However, this study did not look at the role  
417 of the household head's disability status on adolescents' suicidal ideation. Overall,  
418 accelerators appear to impact adolescents' well-being. However, adolescents living  
419 with household heads with disabilities were doing worse than their peers living with  
420 household heads without disabilities before and after the accelerators. New  
421 interventions focused at households may be required. These could include attention  
422 to adolescents and parents' relationships, increased psychosocial, mental and  
423 financial support to offset adolescents' household's disabilities-related inequalities  
424 [38].

### 425 ***Limitations***

426 It is important to note that association does not imply causal relationships. In this  
427 study we could not attribute causation due to the study's cross-sectional nature, and

428 neither could we generalize the results outside the study area and population group.  
429 However, many countries in sub-Saharan Africa are implementing similar  
430 programmes and could find our results useful in their contexts. We performed a  
431 complete sample analysis due to the low prevalence of disability in our sample,  
432 which might have missed nuanced differences experienced by adolescent girls  
433 compared to boys. The prevalence of disability in our sample was low limiting our  
434 ability for further analysis by type of disability. We did not have variables on  
435 occupational type of the household head, and others which could affect household  
436 dynamics including adolescents' well-being. We did not input the missing data  
437 because it was less than 5%. However, we show that adopting accelerators can help  
438 achieve SDGs-aligned well-being indicators for adolescents living in poverty.

### 439 **Conclusion**

440 Our study found multiple and substantial benefits from accelerators – SCT, LLL and  
441 MPA – delivered individually and in combinations, on SDG aligned well-being among  
442 adolescents living in poverty. Adolescents living with household heads with  
443 disabilities benefited less. New interventions maybe necessary to correct disability-  
444 related inequalities between households. More research is needed to understand  
445 combinations of interventions that improve the well-being of adolescents living with  
446 household members who are disabled.

447

### 448 **Funding**

449 The authors declare that this study received funding from United Kingdom Research  
450 in Innovation (UKRI) Global Challenges Research Fund (GCRF) Accelerating  
451 Achievement for Africa's Adolescents Hub (Principle Investigator Prof. Lucie Cluver).  
452 The funder was not involved in the study design, collection, analysis, interpretation of  
453 data, the writing of this article or the decision to submit it for publication.

454

455

456

457

458

459

460

461

462

463

464

465

466

467

468

469

## 470 References

1. United Nations Department of Economic and Social Affairs (UNDESA). World Population Prospects 2019: Highlights. New York: United Nations, Department of Economic and Social Affairs; 2019. Report No.: (ST/ESA/SER.A/423)..
2. Sawyer SM, Peter SA, Dakshitha W, George P. The age of adolescence. *The Lancet Child and Adolescent Health*. 2018 March; 2(3): 223-228.
3. World Health Organization (WHO). Guidelines on mental health promotive and preventive interventions for adolescents: helping adolescents thrive. Geneva: World Health Organization; 2020. Report No.: CC BY-NC-SA 3.0 IGO.
4. World Health Organization (WHO). Adolescent and young adult health. [Online].; 2021 [cited 2021 February 5. Available from: <https://www.who.int/news-room/fact-sheets/detail/adolescents-health-risks-and-solutions>.
5. Uddin R, Burton NW, Maple M, Khan SR, Khan A. Suicidal ideation, suicide planning, and suicide attempts among adolescents in 59 low-income and middle-income countries: a population-based study. *Lancet Child Adolescent Health*. 2019 Apr; 3(4)(doi: 10.1016/S2352-4642(18)30403-6.); 223-233..
6. Dickens L, Marx P. NEET as an Outcome for Care Leavers in South Africa: The Case of Girls and Boys Town. *Emerging Adulthood*. 2020; 8(1 <https://doi.org/10.1177/2167696818805891>): 64-72.
7. International Labour Organisation (ILO). Global Employment Trends for Youth 2020: Technology and the future of jobs. Geneva: International Labour Organisation, International Labour Office; 2020.
8. Porter G, Hampshire K, Lannoy AD, Bango A, Munthali A, Robson E, et al. Youth Livelihoods in the Cellphone Era: Perspectives from Urban Africa. *Journal of International Development*. 2018 January; 30(DOI: 10.1002/jid.3340): 539–558.
9. International Telecommunication Union (ITU). Mobile-cellular Subscriptions Declining in 2020. [Online].; 2021 [cited 2021 February 2. Available from: <https://www.itu.int/en/ITU-D/Statistics/Pages/ff2020interactive.aspx>.
10. Desmond C, Sherr L, Cluver L. Covid-19: accelerating recovery. *Vulnerable Children and Youth Studies*. 2020. May;(DOI: 10.1080/17450128.2020.1766731).
11. United Nations Development Programme (UNDP). SDG Accelerator and Bottleneck Assessment tool. New York: United Nations Development Programme, Sustainable Development Cluster,

UNDP Bureau for Policy; 2017.

12. Cluver LD, Orkin FM, Meinck F, Yakubovich AR, Sherr L. Can Social Protection Improve Sustainable Development Goals for Adolescent Health? PLoS ONE. 2016 October; (e0164808.doi:10.1371/journal.pone.0164808): 11(10).
13. Cluver LD, Orkin FM, Campeau L, Toska E, Webb D, Carlqvist A, et al. Improving lives by accelerating progress towards the UN Sustainable Development Goals for adolescents living with HIV: a prospective cohort study. Lancet Child Adolescence. 2019 April; 3([https://doi.org/10.1016/S2352-4642\(19\)30033-1](https://doi.org/10.1016/S2352-4642(19)30033-1)): 245–54.
14. Cluver LD, Rudgard WE, Toska E, Zhou S, Campeau L, Shenderovich Y, et al. Violence prevention accelerators for children and adolescents in South Africa: A path analysis using two pooled cohorts. PLoS Medicine. 2020 November; e1003383(<https://doi.org/10.1371/journal.pmed.1003383>): 17(11).
15. Nations U. Disability and Development Report. Realizing the Sustainable Development Goals by, for and with persons with disabilities 2018. New York: United Nations, Department of Economic and Social Affairs ; 2019. Report No.: 9789210479035(PDF).
16. WHO, World Health Organization. WHO global disability action plan 2014-2021. Better health for all people with disability. Geneva: WHO, World Health Organization; 2015. Report No.: ISBN 978 92 4 150961 9.
17. Devereux S, Vincent K. Using Technology to Deliver Social Protection: Exploring Opportunities and Risks. In <http://www.jstor.org/stable/27806713>, editor. Development in Practice 20, no. 3.; 2010. p. 367-79.
18. United Nations Partnership on the Rights of Persons with Disabilities. <http://unprpd.org/our-programmes/78>. [Online].; 2020 [cited 2020 August 2020 10. Available from: <http://unprpd.org/our-programmes/78>.
19. Ministry of Community Development and Social Service, Government of the Republic of Zambia. Social Cash Transfers, Investing investing in People's lives, transforming communities, Social Cash Transfer Guidelines. Guidelines. Lusaka: Ministry of Community Development and Social Service; 2018.
20. Handa S, Hoop Td, Morey M, Seidenfeld D. ICC Values in International Development: Evidence across Many Domains in subSaharan Africa..
21. Washington Group on Disability Statistics. The Data Collection Tools Developed by the Washington Group on Disability Statistics and their Recommended Use. Hyattsville: United Nations Statistical Commission, Washington Group on Disability Statistics; 23 October 2017.
22. Anderson ML. Multiple Inference and Gender Differences in the Effects of Early Intervention: A Reevaluation of the Abecedarian, Perry Preschool, and Early Training Projects. Journal of the American Statistical Association. 2008; 103(484 <https://doi.org/10.1198/016214508000000841>): 1481-1495.
23. Sudhanshu H, Luisa N, David S, Gelson T, Benjamin D. Can unconditional cash transfers raise

- long-term living standards? Evidence from Zambia. *Journal of Development Economics*. 2018 July; 133([doi.org/10.1016/j.jdeveco.2018.01.008](https://doi.org/10.1016/j.jdeveco.2018.01.008)): 42-65.
24. Hjelma L, Handa S, de Hoop J, Palermo T. Poverty and perceived stress: Evidence from two unconditional cash transfer programs in Zambia. *Social Science & Medicine*. 2017 March; 177(<https://doi.org/10.1016/j.socscimed.2017.01.023>): 110-117.
  25. Natalia LHS, Peterman A, Seidenfeld D, Tembo G. Does money buy happiness? Evidence from an unconditional cash transfer in Zambia. *SSM - Population Health*. 2018 April; 4(<https://doi.org/10.1016/j.ssmph.2018.02.002>): 225-235.
  26. Bastagli F, Hagen-Zanker J, Harman L, Barca V, Sturge G, Schmidt T, et al. Cash transfers: what does the evidence say? A rigorous review of programme impact and of the role of design and implementation features. London: Overseas Development Institute (ODI); 2016.
  27. Haushofer J, Mudida R, Shapiro JP. The Comparative Impact of Cash Transfers and a Psychotherapy Program on Psychological and Economic Well-being Research NBoE, editor. Cambridge Mass: National Bureau of Economic Research; 2020.
  28. Sun S, Huang J, Hudson DL. Cash Transfers and Health. *Annual Review of Public Health*. 2021 January; 42: 363–80.
  29. Ministry of Health, Government of the Republic of Zambia. Zambia National Malaria Indicator Survey. Lusaka: Ministry of Health, Ministry of Health, Central Statistics Office; 2018.
  30. Nikolov P, Bonci M. Do Public Program Benefits Crowd Out Private Transfers in Developing Countries? A Critical Review of Recent Evidence. *World Development*. 2020 October; 134(104967).
  31. Evans DK, Kosec K. Do Cash Transfers Reduce Trust and Informal Transfers? IFPRI Discussion Paper. Washington, DC: International Food Policy Research Institute (IFPRI), Development Strategy and Governance Division; 2020. Report No.: 01994.
  32. Martin Evans SHaHS. Informal taxes and transfers in sub-Saharan Africa: A review and analysis of incidence in Rwanda. Working paper. London: Overseas Development Institute (ODI), December; 2020. Report No.: 598.
  33. Asfaw S, Davis B. Can Cash Transfer Programmes Promote Household Resilience? Cross-Country Evidence from Sub-Saharan Africa. In Lipper L. MN,ZD,AS,BG, editor. *Climate Smart Agriculture. Natural Resource Management.*: Springer Cham; 2018. p. 227-250.
  34. Giovanelli A, Ozer EM, Dahl RE. Leveraging Technology to Improve Health in Adolescence: A Developmental Science Perspective. *Journal of Adolescent Health*. 2020 August 2020; 67(2): DOI:<https://doi.org/10.1016/j.jadohealth.2020.02.020>: S7eS13.
  35. Barca V, Hurrell A, MacAuslan I, Visram A, Willis J. Paying attention to detail: how to transfer cash in cash transfers. *Enterprise Development and Microfinance*. 2003 March; 24(1).
  36. Koomson I, Bukari C, AVillano R. Mobile money adoption and response to idiosyncratic shocks: Empirics from five selected countries in sub-Saharan Africa. *Technological Forecasting and Social*

Change. 2021 167; 167(120728).

37. Ministry of Education. Educational Statistical Bulletin 2017. Statistical Bulletin. Lusaka: Ministry of Education, Republic of Zambia, Directorate of Planning and Information; 2018.
38. Mitra S, Palmer M, Kim H, Mont D, Groce N. Extra costs of living with a disability: A review and agenda for research. *Disability and Health Journal*. 2017 October; 10(4): 475 - 484.
39. Asuman D, Ackah CG, Agyire-Tettey F. Disability and Household Welfare in Ghana: Costs and Correlates. *Journal of Family and Economic Issues*. 2020 December;(https://doi.org/10.1007/s10834-020-09741-5).
40. Kushal SA, Amin YM, Reza S, Shawon MSR. Parent-adolescent relationships and their associations with adolescentsuicidal behaviours: Secondary analysis of data from 52 countries usingthe Global School-based Health Survey. *EClinical Medicine*. 2020 December;(doi.org/10.1016/j.eclinm.2020.100691).

472

473

474

475

476

477

478

479

480

481

482

483

484

485

486

487

488

489

490

491

492

493

494

495

Table 1: Social demographic characteristics, hypothesized accelerators and SDG-aligned targets by disability status of the household head

| Variables                                                   | not disabled |      | disabled |      | P-value | Total | %    |
|-------------------------------------------------------------|--------------|------|----------|------|---------|-------|------|
|                                                             | n=1580       | %    | n=145    | %    |         |       |      |
| <b>Socio-demographic characteristics</b>                    |              |      |          |      |         |       |      |
| Age (years)                                                 |              |      |          |      |         |       |      |
| 16 – 19                                                     | 951          | 60.2 | 67       | 46.2 | 0.001   | 1018  | 59.0 |
| 20 – 24                                                     | 629          | 39.8 | 78       | 53.8 |         | 707   | 41.0 |
| Sex, Male                                                   | 787          | 49.8 | 57       | 39.3 | 0.015   | 844   | 48.9 |
| Female                                                      | 793          | 50.2 | 88       | 60.7 |         | 881   | 51.1 |
| <b>Distance to nearest the health facility (kilometres)</b> |              |      |          |      |         |       |      |
| 0 – 6                                                       | 1291         | 81.7 | 121      | 83.4 | 0.489   | 1412  | 81.9 |
| 7 and over                                                  | 242          | 15.3 | 19       | 13.1 |         | 261   | 15.1 |
| Missing                                                     | 47           | 3.0  | 5        | 3.4  |         | 52    | 3.0  |
| District                                                    |              |      |          |      | 0.339   |       |      |
| Kawambwa                                                    | 502          | 31.8 | 55       | 37.9 |         | 557   | 32.3 |
| Mansa                                                       | 311          | 19.7 | 22       | 15.2 |         | 333   | 19.3 |
| Nchelenge                                                   | 378          | 23.9 | 31       | 21.4 |         | 409   | 23.7 |
| Samfya                                                      | 389          | 24.6 | 37       | 25.5 | 426     | 24.7  |      |
| <b>Hypothesized accelerators</b>                            |              |      |          |      |         |       |      |
| SCT                                                         |              |      |          |      | 0.862   |       |      |
| No                                                          | 157          | 9.9  | 15       | 10.3 |         | 172   | 10.0 |
| Yes                                                         | 1408         | 89.1 | 128      | 88.3 |         | 1536  | 89.0 |
| Missing                                                     | 15           | 0.9  | 2        | 1.4  | 17      | 1.0   |      |
| MPA                                                         |              |      |          |      | 0.759   |       |      |
| No                                                          | 1081         | 68.4 | 101      | 69.7 |         | 1182  | 68.5 |
| Yes                                                         | 499          | 31.6 | 44       | 30.3 | 543     | 31.5  |      |
| LLL                                                         |              |      |          |      | 0.069   |       |      |
| No                                                          | 868          | 54.9 | 68       | 46.9 |         | 936   | 54.3 |
| Yes                                                         | 697          | 44.1 | 75       | 51.7 |         | 772   | 44.8 |
| Missing                                                     | 15           | 0.9  | 2        | 1.4  | 17      | 1.0   |      |



SDG aligned target indicators

|                                                             |                 |      |      |     |      |       |      |      |
|-------------------------------------------------------------|-----------------|------|------|-----|------|-------|------|------|
| SDG 1.2. No poverty                                         | Very poor       | 1103 | 69.8 | 115 | 79.3 |       | 1218 | 70.6 |
|                                                             | Moderately poor | 462  | 29.2 | 28  | 19.3 | 0.012 | 490  | 28.4 |
|                                                             | Missing         | 15   | 0.9  | 2   | 1.4  |       | 17   | 1.0  |
| SDG 1.3.1 Informal cash transfers                           | No              | 1260 | 79.7 | 118 | 81.4 |       | 1378 | 79.9 |
|                                                             | Yes             | 305  | 19.3 | 25  | 17.2 | 0.561 | 330  | 19.1 |
|                                                             | Missing         | 15   | 0.9  | 2   | 1.4  |       | 17   | 1.0  |
| SDG 3. Good health                                          | Physically sick | 1062 | 67.2 | 107 | 73.8 |       | 1169 | 67.8 |
|                                                             | Not sick        | 503  | 31.8 | 36  | 24.8 | 0.086 | 539  | 31.2 |
|                                                             | Missing         | 15   | 0.9  | 2   | 1.4  |       | 17   | 1.0  |
| SDG 3.4. No suicidal ideation                               | Yes             | 156  | 9.9  | 29  | 20.0 |       | 185  | 10.7 |
|                                                             | No              | 1404 | 88.9 | 114 | 78.6 | 0.000 | 1518 | 88.0 |
|                                                             | Missing         | 20   | 1.3  | 2   | 1.4  |       | 22   | 1.3  |
| SDG 3.4. Seeking mental support                             | No              | 1087 | 68.8 | 100 | 69.0 |       | 1187 | 68.8 |
|                                                             | Yes             | 479  | 30.3 | 43  | 29.7 | 0.898 | 522  | 30.3 |
|                                                             | Missing         | 14   | 0.9  | 2   | 1.4  |       | 16   | 0.9  |
| SDG 4.1. School enrolment                                   | No              | 901  | 57.0 | 89  | 61.4 |       | 990  | 57.4 |
|                                                             | Yes             | 678  | 42.9 | 56  | 38.6 | 0.314 | 734  | 42.6 |
| SDG 10. No health access restrictions related to disability | Limited         | 243  | 15.4 | 21  | 14.5 |       | 264  | 15.3 |
|                                                             | Not limited     | 1290 | 81.6 | 119 | 82.1 | 0.791 | 1409 | 81.7 |
|                                                             | Missing         | 47   | 3.0  | 5   | 3.4  |       | 52   | 3.0  |

p-value is for Fisher's exact test

496

497

498

499

500

501



Table 2A: Crude analysis of associations between hypothesized accelerators and SDG aligned targets

| SGD-aligned targets                              | <i>Hypothesized accelerators, absolute values [proportions], p-value</i> |                     |             |                     |             |                     |
|--------------------------------------------------|--------------------------------------------------------------------------|---------------------|-------------|---------------------|-------------|---------------------|
|                                                  | SCT                                                                      |                     | LLL         |                     | MPA         |                     |
|                                                  | Yes                                                                      | No                  | Yes         | No                  | Yes         | No                  |
| 1.2. No poverty                                  | 442 [28.8%],                                                             | 46 [26.7%]; 0.318   | 207[26.8%], | 281 [30.1%]; 0.074  | 212[39.0%], | 278 [23.9%]; <0.001 |
| 1.3.1 Informal cash transfers                    | 323 [21.0%],                                                             | 7[4.7%]; <0.001     | 228[29.5%], | 102 [10.9%]; <0.001 | 144[26.6%], | 186 [16.0%]; <0.001 |
| 3. Good health                                   | 489 [31.8%],                                                             | 50 [29.7%]; 0.258   | 253[32.8%], | 285 [30.5%]; 0.168  | 187[34.5%], | 352 [30.2%]; 0.042  |
| 3.4. No suicidal ideation                        | 1381[90.2%],                                                             | 137 [79.7%]; <0.001 | 674[87.6%], | 843 [90.4%]; 0.044  | 475[87.6%], | 1043 [89.8%]; 0.102 |
| 3.4 Seeking mental support                       | 447 [29.1%],                                                             | 75 [43.6%]; <0.001  | 278[36.0%], | 244 [26.1%]; <0.001 | 208[38.4%], | 314 [26.9%]; <0.001 |
| 4.1. School enrolment                            | 662 [43.1%],                                                             | 65 [37.8%]; 0.103   | 302[39.1%], | 424 [45.4%];0.005   | 265[48.8%], | 469 [39.7%]; <0.001 |
| 10. No health restrictions related to disability | 1293[85.8%],                                                             | 116[69.9%]; <0.001  | 613[82.0%], | 795 [86.0%]; 0.014  | 453[83.9%], | 956 [84.4%]; 0.425  |

Fisher's exact test.

Table 2B: Associations between hypothesized accelerators and SDG aligned targets indicators adjusted for social demographic characteristics

| SGD-aligned Targets                          | Hypothesized Accelerators (Adjusted Odds Ratios, 95% Confidence Intervals, P-value) |                            |                            |
|----------------------------------------------|-------------------------------------------------------------------------------------|----------------------------|----------------------------|
|                                              | SCT                                                                                 | LLL                        | MPA                        |
| 1.2. No poverty                              | 1.15[0.66 - 1.98], 0.624                                                            | 0.86[0.59 - 1.23], 0.398   | 2.08[1.39 - 3.09], 0.001*  |
| 1.3.1 Informal transfers                     | 7.68[2.56 - 23.01], 0.000*                                                          | 3.49[2.24 - 5.45], 0.001*  | 1.82 [1.21 - 2.74], 0.004* |
| 3. Good health                               | 1.06[0.55 - 2.04], 0.859                                                            | 1.14[0.85 - 1.54], 0.379   | 1.27[0.89 - 1.80], 0.184   |
| 3.4. No suicidal ideation                    | 1.93[0.93 - 3.99], 0.077                                                            | 0.95[0.59 - 1.49], 0.809   | 0.86[0.49 - 1.51], 0.594   |
| 3.4 Seeking mental support                   | 0.53[0.29 - 0.94], 0.029*                                                           | 1.34[0.99 - 1.80], 0.054   | 1.61[1.08 - 2.40], 0.020*  |
| 4.1. School enrolment                        | 1.22[0.87 - 1.72], 0.246                                                            | 0.70 [0.55 - 0.89], 0.004* | 1.65[1.25 - 2.18], 0.001*  |
| 10. No disability health access restrictions | 2.56[1.35 - 4.88], 0.004*                                                           | 0.67[0.42 - 1.07], 0.097   | 0.92[0.58 - 1.45], 0.713   |

Type of test conducted Wald Test. \*Statistically significant ( $p < .05$ ) after multiple hypothesis testing correction with the FDR sharpened Qs. Adjusted for age, gender, household head disability status, distance to the nearest health facility and district.



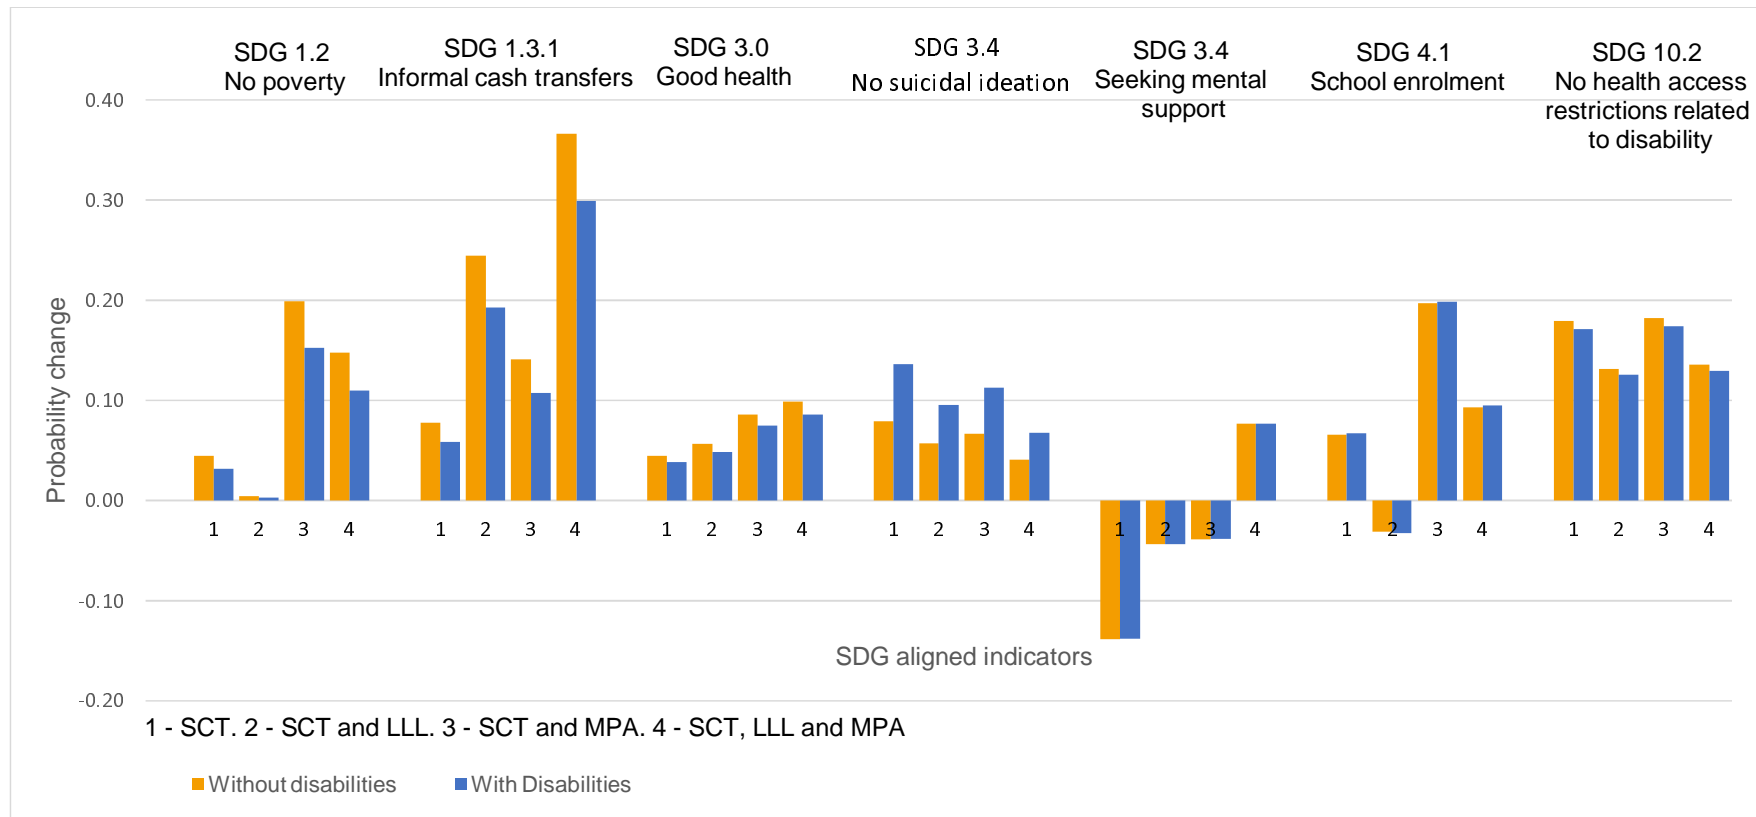

Figure 1: Levels of probability change in SDG-aligned targets indicators outcomes from 1) SCT alone, 2) SCT plus LLL 3) SCT plus MPA, and 4) SCT plus LLL and MPA, stratified by household heads' disability status – without (blue bars) and with disabilities (Orange bars).

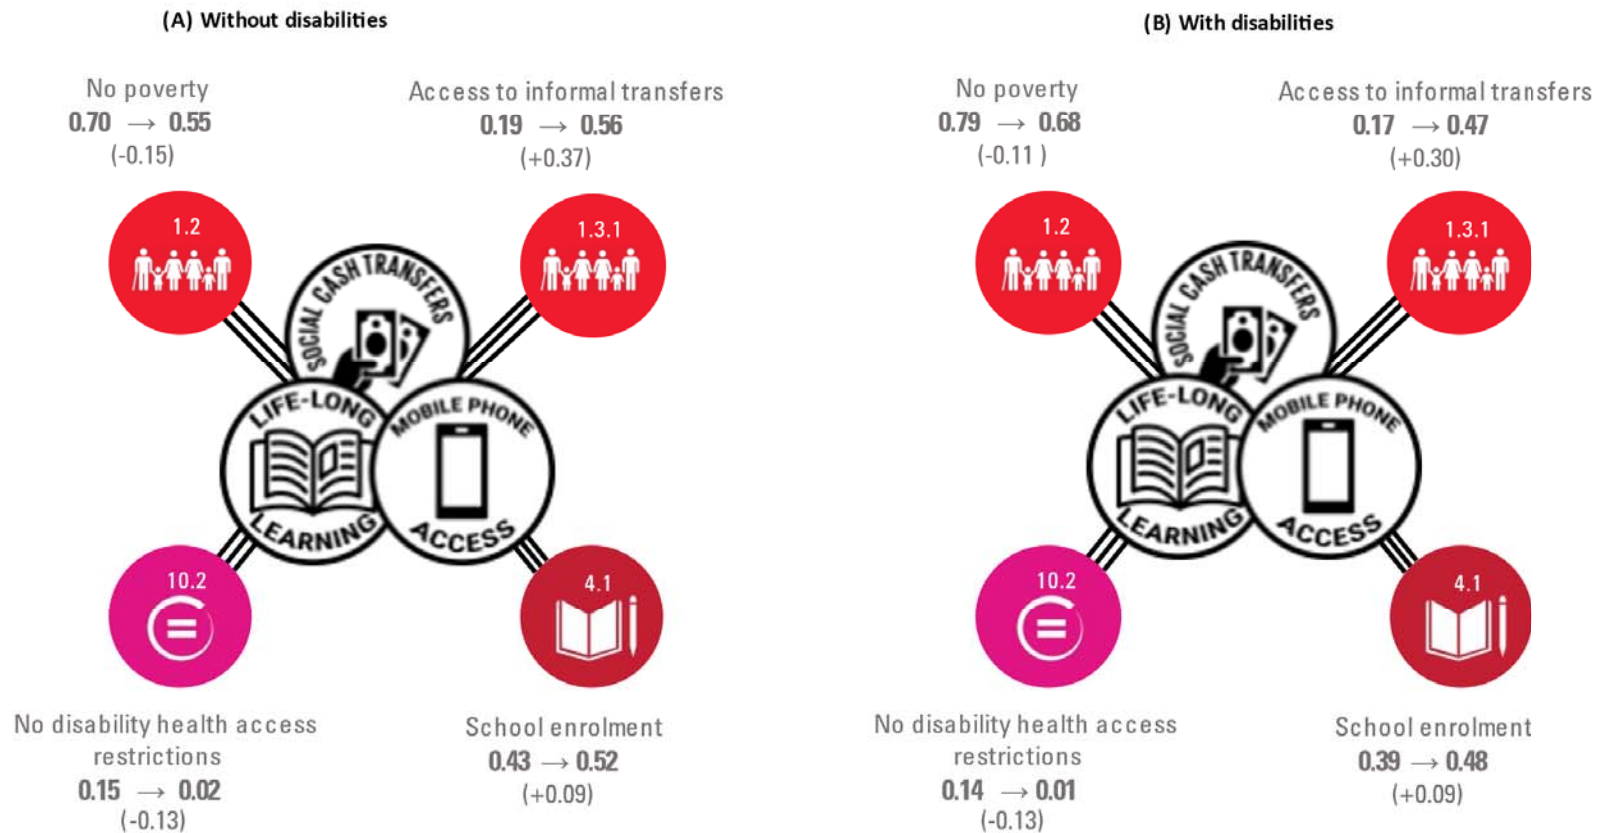

Figure 2: Changes in probability levels of SDG-aligned outcomes for adolescents living with household heads without (A) and with disabilities (B) from synergies of interventions.

Supplementary Table 1: Associations between hypothesized accelerators and SDG aligned targets using probit models

| SGD-aligned targets                              | Hypothesized accelerators, Coefficient [95% CI], P-value |                              |                             |
|--------------------------------------------------|----------------------------------------------------------|------------------------------|-----------------------------|
|                                                  | SCT                                                      | LLL                          | MPA                         |
| 1.2. No poverty                                  | 0.15 [-0.08 - 0.37], 0.197                               | -0.14 [-0.27 - -0.01], 0.043 | 0.44 [0.30 - 0.57], <0.001  |
| 1.3.1 Informal cash transfers                    | 0.80 [0.44 - 1.17], <0.001                               | 0.66 [0.51 - 0.81], <0.001   | 0.35 [0.20 - 0.50], <0.001  |
| 3. Good health                                   | 0.14 [-0.08 - 0.36], 0.215                               | 0.04 [0-.09 - 0.17], 0.549   | 0.13 [-0.01 - 0.26], 0.064  |
| 3.4. No suicidal ideation                        | 0.44 [0.20 - 0.69], <0.001                               | -0.17 [-0.33 - -0.01], 0.048 | -0.08 [-0.26 - 0.09], 0.342 |
| 3.4 Seeking mental support                       | -0.44 [-0.65 - -0.23], <0.001                            | 0.29 [0.16 - 0.42], <0.001   | 0.31 [0.18 - 0.45], <0.001  |
| 4.1. School enrolment                            | 0.17 [-0.04 - 0.40], 0.117                               | -0.23 [-0.36 - -0.1], <0.001 | 0.31 [0.17 - 0.45], <0.001  |
| 10. No health restrictions related to disability | 0.65 [0.42 - 0.88], <0.001                               | -0.22 [-0.37 - -0.08], 0.003 | -0.02 [-.18 - 0.13], 0.776  |

Probit models accounting for correlation between error terms. Adjusted for age, gender, household head disability status, distance to the nearest health facility and district
